# Supplementary material for: Comparative Metabolomics of Small Molecules Specifically Expressed in the Dorsal or Ventral Marginal Zones in Vertebrate Gastrula
Source: Metabolites. 2022 Jun 20;12(6):566. doi: 10.3390/metabo12060566 (PMC9229639; doi:10.3390/metabo12060566)
Supplement: Supplementary file 1 [file metabolites-12-00566-s001.zip › Supplementary Materials_Tables S1-S2.xlsx]

## Sheet: Table S1
Table S1. List of hydrophilic metabolites with high VIP scores (VIP scores >1.0) in supernatants.
Metabolite	VIP score
Hypoxanthine	2.7921
Cysteine sulfinic acid	2.44152
Guanine	2.15045
1-Methylhistamine	1.46827
Betaine	1.3985
Glucuronic acid	1.39051
Pyruvic acid	1.35579
Ala+beta-Ala	1.28409
GTP	1.25689
Carnitine	1.25616
Alpha-Methylserine	1.25021
ATP	1.24812
Diethanolamine	1.24455
CTP	1.23569
Citric acid	1.22996
UTP	1.22948
Leu	1.2271
Ile	1.21207
Methyl sulfic acid	1.20733
3PG + 2PG	1.20635
Benzoylformic acid	1.19528
Val	1.18866
Citramalic acid+2-Hydroxyglutaric acid	1.14581
Spermidine	1.11506
Succinic acid	1.11429
CMP	1.07461
N-Acetylglutamic acid	1.05359
3-Phenyllactic acid	1.05194
Sebacic acid	1.03774
Phthalic acid	1.02387

## Sheet: Table S2
Table S2. List of hydrophilic metabolites with high VIP scores (VIP scores >1.0) in explants.
Metabolite	VIP score
Hypoxanthine	2.54186
Cadaverine	2.36312
Guanine	2.14131
Heptanoic acid	1.94636
5-Methylthioadenosine	1.94519
Putrescine	1.91924
F6P	1.9172
G6P	1.84312
G1P	1.8327
Choline	1.82896
Cysteic acid	1.77673
NADH	1.74422
2,3-DPG	1.73561
Tyr	1.68852
Glucuronic acid	1.64099
7-Methylguanine	1.64053
4-(beta-Acetylaminoethyl)imidazole	1.627
dCMP	1.62694
NADPH	1.6262
PRPP	1.52446
Creatine	1.52054
Spermidine	1.51616
Phosphonoacetic acid	1.50288
1-Methylhistamine	1.49803
cAMP	1.46965
UDP-N-acetylglucosamine	1.43625
Citrulline	1.43334
dUMP	1.42148
S7P	1.39953
dTTP	1.34732
GDP-mannose	1.34112
2-Furoic acid	1.34041
Ser	1.32749
Phosphorylcholine	1.3201
Betaine aldehyde	1.27722
CoA	1.25908
ATP	1.25668
CTP	1.25397
Ribulose 1,5-diphosphate	1.25082
Cysteine sulfinic acid	1.23825
O-Phosphoserine	1.21882
UTP	1.21531
6-Phosphogluconic acid	1.18636
Asn	1.17098
Hydroxyproline	1.16875
Biotin	1.13739
Glutaric acid	1.13588
Pimelic acid	1.1261
N-Acetylleucine	1.12115
3PG + 2PG	1.11919
N-Acetylneuraminic acid	1.11722
IMP	1.11352
UMP	1.09738
Thiamine	1.09418
2-Hydroxy-4-methylpentanoic acid	1.09158
dATP	1.08155
FAD	1.07956
ADP-ribose	1.07398
Trimethylamine N-oxide	1.04368
2-Hydroxyisobutyric acid + 3-Hydroxybutyric acid + 2-Hydroxybutyric acid	1.02244
dGTP	1.01934
Pentanoic acid	1.0191
3-Methylbutanoic acid	1.00908
UDP-glucuronic acid	1.00786
